# Supplementary material
Source: Royal Society of Chemistry journal article supplement (doi:10.1039/d6ma00353b)
Supplement: d6ma00353b1.pdf [file d6ma00353b1.pdf]

**Supporting information:**

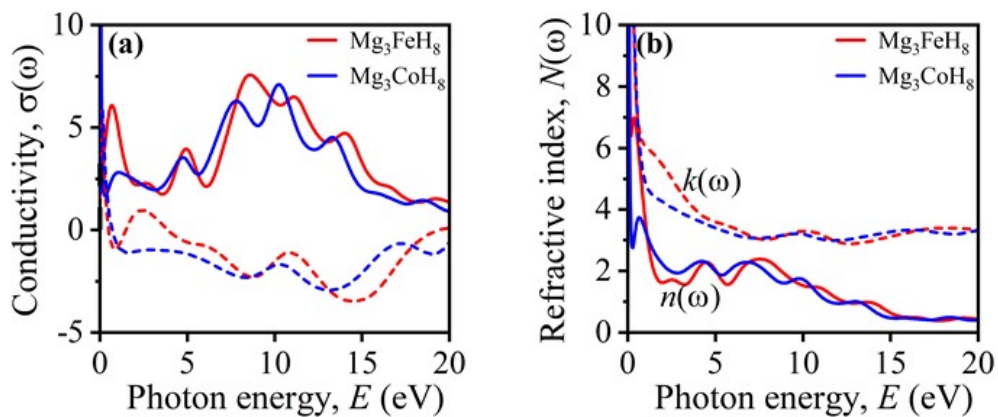

**Fig. S1:** Optical conductivity and refractive properties of  $\text{Mg}_3\text{ZH}_8$  ( $Z = \text{Fe}, \text{Co}$ ): (a) real and imaginary parts of optical conductivity  $\sigma(\omega)$ , and (b) refractive index  $n(\omega)$  and extinction coefficient  $k(\omega)$  as a function of photon energy. The results indicate metallic behavior with strong charge transport and optical response.
